# Supplementary material
Source: HighWire-hosted journal article supplement (http://www.cmaj.ca/highwire/filestream/58436/field_highwire_adjunct_files/0/analysismay9-1-at.pdf)
Supplement: analysismay9-1-at.pdf [file analysismay9-1-at.pdf]

**Appendix 1: Municipal SRI scores by province, 2001**

| <b>BC</b>                      | <b>Alta. (cont'd)</b> | <b>Ont. (cont'd)</b> | <b>Ont. (cont'd)</b> |                   |                      |
|--------------------------------|-----------------------|----------------------|----------------------|-------------------|----------------------|
| Abbotsford                     | 3                     | High River           | 1                    | Carleton Place    | 1 Woodstock 82       |
| Burnaby                        | 1                     | Innisfail            | 2                    | Clarence Rockland | 1 <i>Counties</i>    |
| Castlegar                      | 94                    | Leduc                | 1                    | Clarington        | 1 York 81            |
| Coquitlam                      | 93                    | Lethbridge           | 82                   | Cobourg           | 1 No. scoring 0 155  |
| Cranbrook                      | 1                     | Lloydminster         | 1                    | Collingwood       | 1                    |
| Delta                          | 18                    | Medicine Hat         | 81                   | Cornwall          | 82 <b>Que.</b>       |
| Fort St. John                  | 80                    | St. Albert           | 1                    | Espanola          | 81 Bromptonville 80  |
| Kamloops                       | 83                    | Taber                | 2                    | Essa              | 6 Chambly 1          |
| Langley                        | 13                    | <i>Counties</i>      |                      | Gravenhurst       | 1 Kirkland 1         |
| Nelson                         | 83                    | Rocky View No. 44    | 1                    | Guelph            | 82 Lévis 1           |
| Port Moody                     | 98                    | Wood Buffalo         | 93                   | Halton Hills      | 80 Loretteville 80   |
| Prince George                  | 80                    | No. scoring 0        | 55                   | Hamilton          | 80 Marieville 1      |
| Richmond                       | 19                    |                      |                      | Hawkesbury        | 1 Matane 1           |
| Surrey                         | 98                    | <b>Sask.</b>         |                      | Innisfil          | 80 Pierrefonds 1     |
| Vancouver                      | 13                    | Melfort              | 3                    | Kapuskasing       | 1 Pointe-Claire 1    |
| Vernon                         | 1                     | Moose Jaw            | 3                    | King              | 81 Sorel 1           |
| White Rock                     | 19                    | Prince Albert        | 2                    | Kingston          | 81 Ste-Foy 1         |
| Trail                          | 83                    | Regina               | 2                    | Kingsville        | 1 Westmount 82       |
| Port Coquitlam                 | 18                    | Swift Current        | 3                    | London            | 13 <i>Regions</i>    |
| <i>Districts</i>               |                       | Tisdale              | 2                    | Midland           | 1 Portneuf 80        |
| Capital                        | 1                     | Warman               | 1                    | Mississauga       | 80 No. scoring 0 273 |
| Cowichan Valley                | 81                    | Yorkton              | 1                    | North Bay         | 1                    |
| Kitimat-Stikine                | 2                     | Melfort              | 3                    | North Dundas      | 1 <b>NB</b>          |
| Nanaimo                        | 81                    | No. scoring 0        | 65                   | Oakville          | 82 Bathurst 80       |
| <i>District municipalities</i> |                       |                      |                      | Orangeville       | 82 Fredericton 14    |
| Kitimat                        | 82                    | <b>Man.</b>          |                      | Ottawa            | 100 Moncton 1        |
| Maple Ridge                    | 98                    | Thompson             | 1                    | Pembroke          | 1 No. scoring 0 63   |
| Mission                        | 82                    | Winnipeg             | 2                    | Perth East        | 82                   |
| Pitt Meadows                   | 82                    | No. scoring 0        | 15                   | Peterborough      | 80 <b>NS</b>         |
| Sechelt                        | 1                     |                      |                      | Pickering         | 3 Halifax 2          |
| Squamish                       | 82                    | <b>Ont.</b>          |                      | Quinte West       | 1 No. scoring 0 26   |
| Summerland                     | 1                     | Ajax                 | 14                   | Sarnia            | 1                    |
| West Vancouver                 | 1                     | Barrie               | 1                    | Sault Ste. Marie  | 81 <b>PEI</b>        |
| No. scoring 0*                 | 58                    | Belleville           | 82                   | Stratford         | 82 No. scoring 0 74  |
|                                |                       | Bracebridge          | 1                    | Thunder Bay       | 1                    |
| <b>Alta.</b>                   |                       | Brampton             | 81                   | Timmins           | 3 <b>Nfld.</b>       |
| Bonnyville                     | 1                     | Brantford            | 1                    | Toronto           | 82 No. scoring 0 39  |
| Cochrane                       | 12                    | Brockville           | 2                    | West Perth        | 1                    |
| Edmonton                       | 83                    | Burlington           | 1                    | Whitby            | 3                    |
| Grand Prairie                  | 1                     | Caledon              | 80                   | Windsor           | 82                   |

\*Municipalities scored 0 either because they had no smoke-free laws or because their laws only partially restricted smoking in defined areas.
